# Supplementary material
Source: publisher figshare collection journal article supplement (https://sage.figshare.com/ndownloader/files/13264277)
Supplement: Supplementary file 1 [file 13264277]

## Methodology File

### Study A Measures

Age:

Gender:

- ☐ Male (1)
- ☐ Female (2)

Which ethnic group do you belong to?

- ☐ African American/Black (1)
- ☐ Asian/Asian American/Pacific Islander (2)
- ☐ Caucasian/White (3)
- ☐ Latino(a)/Hispanic (4)
- ☐ Middle Eastern (5)
- ☐ Native American (6)
- ☐ Biracial/ Mixed Race (7)

If an Asian American and a White American have a kid...[used response scale below unless otherwise noted]

- ☐ 1 - More Asian (1)
- ☐ 2 (2)
- ☐ 3 (3)
- ☐ 4 - Equally Asian and White (4)
- ☐ 5 (5)
- ☐ 6 (6)
- ☐ 7 - More White (7)

Do you think the kid will look more like an Asian person or a White person?

Visually, will the kid stand out more in a group of Asian people or White people?

Will others likely label the kid as an Asian person or a White person, based on looks alone?

Will the kid resemble his/her Asian parent or White parent more?

Overall, will the kid look more like other Asian people or other White people?

Do you think the kid will act more like an Asian person or a White person?

Will the kid's behavior lead those around to categorize him/her as Asian or White?

Is the kid more likely to act in ways that can be identified with Asian culture or with White culture?

- ☐ 1 - More with Asian culture (1)
- ☐ 2 (2)
- ☐ 3 (3)
- ☐ 4 - Equally with Asian and White culture (4)
- ☐ 5 (5)
- ☐ 6 (6)
- ☐ 7 - More with White culture (7)

Will the kid copy the actions of Asian or White celebrities more?

Will the kid's actions make him/her stand out more with Asians or Whites?

- ☐ 1 - More with Asians (1)
- ☐ 2 (2)
- ☐ 3 (3)
- ☐ 4 - Equally with Asians and Whites (4)
- ☐ 5 (5)
- ☐ 6 (6)
- ☐ 7 - More with Whites (7)

Do you think the kid will fit in better with Asian people or White people?

- ☐ 1 - Better with Asians (1)
- ☐ 2 (2)
- ☐ 3 (3)
- ☐ 4 - Equally well with Asians and Whites (4)
- ☐ 5 (5)
- ☐ 6 (6)
- ☐ 7 - Better with Whites (7)

In school, will the kid likely feel more out of place with Asian people or White people?

- ☐ 1 - With Asians (1)
- ☐ 2 (2)
- ☐ 3 (3)
- ☐ 4 - Equally with Asians and Whites (4)
- ☐ 5 (5)
- ☐ 6 (6)
- ☐ 7 - With Whites (7)

Do you think the kid will be accepted more by Asian people or by White people?

Do you think the kid will feel most comfortable hanging out with Asian people or White people?

- ☐ 1 - More comfortable with Asians (1)
- ☐ 2 (2)
- ☐ 3 (3)
- ☐ 4 - Equally comfortable with Asians and Whites (4)
- ☐ 5 (5)
- ☐ 6 (6)
- ☐ 7 - More comfortable with Whites (7)

Do you think the kid will end up hanging out with Asian people or with White people more?

- ☐ 1 - More with Asians (1)
- ☐ 2 (2)
- ☐ 3 (3)
- ☐ 4 - Equally with Asians and Whites (4)
- ☐ 5 (5)
- ☐ 6 (6)
- ☐ 7 - More with Whites (7)

Do you think the kid should be thought of as relatively Asian or relatively White?

- ☐ 1 - Relatively Asian (1)
- ☐ 2 (2)
- ☐ 3 (3)
- ☐ 4 - Equally Asian and White (4)
- ☐ 5 (5)
- ☐ 6 (6)
- ☐ 7 - Relatively White (7)

Will the kid give off the general impression of being more Asian or more White?

Would you consider the kid more Asian or more White?

Do you think the kid will be more like his/her Asian parent or his/her White parent?

- ☐ 1 - More like the Asian parent (1)
- ☐ 2 (2)
- ☐ 3 (3)
- ☐ 4 - Equally like the Asian and White parent (4)
- ☐ 5 (5)
- ☐ 6 (6)
- ☐ 7 - More like the White parent (7)

Should the kid be considered more different than his/her Asian parent or his/her White parent?

- ☐ 1 - More different than Asian parent (1)
- ☐ 2 (2)
- ☐ 3 (3)

- ☐ 4 - Equally different than Asian and White parent (4)
- ☐ 5 (5)
- ☐ 6 (6)
- ☐ 7 - More different than White parent (7)

Imagine a child with 2 Asian grandparents and 2 White grandparents...

To what extent do you consider this child to be Asian or White?

- ☐ Completely Asian (1)
- ☐ Predominantly Asian (2)
- ☐ Somewhat more Asian than White (3)
- ☐ Equally Asian and White (4)
- ☐ Somewhat more White than Asian (5)
- ☐ Predominantly White (6)
- ☐ Completely White (7)

Generally speaking, how much do you think people who are part-Asian and part-White want to identify as Asian?

Generally speaking, how much do you think people who are part-Asian and part-White want to identify as White?

- ☐ 1-Not at all (1)
- ☐ 2 (2)
- ☐ 3 (3)
- ☐ 4 (4)
- ☐ 5 (5)
- ☐ 6 (6)
- ☐ 7-Very much (7)





|                                                                                                                                       | 1 - Not at all (1)    | 2 (2)                 | 3 (3)                 | 4 (4)                 | 5 (5)                 | 6 (6)                 | 7 - Very much (7)     |
|---------------------------------------------------------------------------------------------------------------------------------------|-----------------------|-----------------------|-----------------------|-----------------------|-----------------------|-----------------------|-----------------------|
| To what extent will prejudice and discrimination against members of your ethnic group impose barriers to their future outcomes? (1)   | <input type="radio"/> |
| To what extent will prejudice and discrimination against you, because of your ethnicity, impose barriers to your future outcomes? (2) | <input type="radio"/> |

Show how much you favor or oppose each idea below. You can work quickly; your first feeling is generally best.

- ☐ Strongly Oppose (1)
- ☐ Somewhat Oppose (2)
- ☐ Slightly Oppose (3)
- ☐ Neutral (4)
- ☐ Slightly Favor (5)
- ☐ Somewhat favor (6)
- ☐ Strongly favor (7)

Some groups of people must be kept in their place.

It's probably a good thing that certain groups are at the top and other groups are at the bottom.

An ideal society requires some groups to be on top and others to be on the bottom.

Some groups of people are simply inferior to other groups.

Groups at the bottom are just as deserving as groups at the top.

No one group should dominate in society.

Groups at the bottom should not have to stay in their place.

Group dominance is a poor principle.

We should not push for group equality.

We shouldn't try to guarantee that every group has the same quality of life.

It is unjust to try to make groups equal.

Group equality should not be our primary goal.

We should work to give all groups an equal chance to succeed.

We should do what we can to equalize conditions for different groups.

No matter how much effort it takes, we ought to strive to ensure that all groups have the same chance in life.

Group equality should be our ideal.

### **Study A Other Items**

If the child needed to check only one census box for "race," should he/she check "Asian" or "White"?



- ☐ 1 - He/she should check Asian (1)
- ☐ 2 - He/she should check White (2)

Imagine a child with 1 Asian grandparent and 3 White grandparents...

To what extent do you consider this child to be Asian or White?

- ☐ Completely Asian (1)
- ☐ Predominantly Asian (2)
- ☐ Somewhat more Asian than White (3)
- ☐ Equally Asian and White (4)
- ☐ Somewhat more White than Asian (5)
- ☐ Predominantly White (6)
- ☐ Completely White (7)

If the child needed to check only one census box for "race," should he/she check "Asian" or "White"?

- ☐ 1 - He/she should check Asian (1)
- ☐ 2 - He/she should check White (2)

It is important for Asian people to surround their children with Asian art, music and literature.

Asian people should not marry interracially.

Asians would be better off if they adopted Asian values.

Asian students are better off going to schools that are controlled and organized by Asians.

Asian people must organize themselves into a separate Asian political force.

Whenever possible, Asians should buy from other Asian businesses.

A thorough knowledge of Asian history is very important for Asians today.

Asians and Whites can never live in true harmony because of racial differences.

White people can never be trusted where Asians are concerned.

How much progress has been made toward equality for Asian Americans in the US?

- ☐ 1 - Little progress (1)
- ☐ 2 (2)
- ☐ 3 (3)
- ☐ 4 (4)
- ☐ 5 (5)
- ☐ 6 (6)
- ☐ 7 - A great deal of progress (7)

How much further do you think the US has to go to create equality for Asian Americans in the future?

- ☐ 1 - Not much further (1)
- ☐ 2 (2)
- ☐ 3 (3)
- ☐ 4 (4)
- ☐ 5 (5)
- ☐ 6 (6)
- ☐ 7 - Much further (7)

How much have conditions improved for Asian Americans in the US?

- ☐ 1 - Not at all (1)
- ☐ 2 (2)
- ☐ 3 (3)
- ☐ 4 (4)
- ☐ 5 (5)
- ☐ 6 (6)
- ☐ 7 - A great deal (7)

As a group, Asian Americans have not achieved as much upward mobility as they deserve.

As a group, Asian Americans have not done enough in order to achieve gains in racial equality.

Asian Americans do not stick together enough.

Asian Americans need to do more together in order to fight for equality.

- ☐ 1 - Strongly disagree (1)
- ☐ 2 (2)
- ☐ 3 (3)
- ☐ 4 (4)
- ☐ 5 (5)
- ☐ 6 (6)
- ☐ 7 - Strongly agree (7)

Generally speaking, how much do you think people who are part-Asian and part-White want to identify as Mixed or Multiracial?

Generally speaking, how much do you think people who are part-Asian and part-White can choose to identify with whatever racial groups they want?

Generally speaking, how much do you think outside forces (including other people and situations) determine how people who are part-Asian and part-White racially identify?

- ☐ 1-Not at all (1)
- ☐ 2 (2)
- ☐ 3 (3)
- ☐ 4 (4)
- ☐ 5 (5)
- ☐ 6 (6)
- ☐ 7-Very much (7)

Which of the following images reflects how you see Asian people as they relate to Asian-White biracials? [response options displayed adapted inclusion of other in self scale with two circles, representing Asian people and Asian-White biracial people, and the four response choices increased in the overlapping between circles]

When Asian-White people call themselves “Multiracial,”...



How seriously have you considered participating in the following activities on behalf of your ethnic group?

|                                                                         | 1-Not at all<br>seriously (1) | 2 (2)                 | 3 (3)                 | 4 (4)                 | 5-Very<br>seriously<br>(having done<br>so) (5) |
|-------------------------------------------------------------------------|-------------------------------|-----------------------|-----------------------|-----------------------|------------------------------------------------|
| 1. Joining an ethnic organization (1)                                   | <input type="radio"/>         | <input type="radio"/> | <input type="radio"/> | <input type="radio"/> | <input type="radio"/>                          |
| 2. Voting in terms of what is good for your particular ethnic group (2) | <input type="radio"/>         | <input type="radio"/> | <input type="radio"/> | <input type="radio"/> | <input type="radio"/>                          |
| 3. Participating in demonstrations (3)                                  | <input type="radio"/>         | <input type="radio"/> | <input type="radio"/> | <input type="radio"/> | <input type="radio"/>                          |
| 4. Signing petitions (4)                                                | <input type="radio"/>         | <input type="radio"/> | <input type="radio"/> | <input type="radio"/> | <input type="radio"/>                          |
| 5. Sending letters to government officials or organizations (5)         | <input type="radio"/>         | <input type="radio"/> | <input type="radio"/> | <input type="radio"/> | <input type="radio"/>                          |
| 6. Going door-to-door or telephoning to enlist public support (6)       | <input type="radio"/>         | <input type="radio"/> | <input type="radio"/> | <input type="radio"/> | <input type="radio"/>                          |



Please rate how cold or warm you feel toward Blacks (0 = coldest feelings, 50=neutral, 100 = warmest feelings)

- ☐ 0° - Very Cold (1)
- ☐ 10° (2)
- ☐ 20° (3)
- ☐ 30° (4)
- ☐ 40° (5)
- ☐ 50° (6)
- ☐ 60° (7)
- ☐ 70° (8)
- ☐ 80° (9)
- ☐ 90° (10)
- ☐ 100° - Very Warm (11)

Please rate how cold or warm you feel toward Whites (0 = coldest feelings, 50=neutral, 100 = warmest feelings)

- ☐ 0° - Very Cold (1)
- ☐ 10° (2)
- ☐ 20° (3)
- ☐ 30° (4)
- ☐ 40° (5)
- ☐ 50° (6)
- ☐ 60° (7)
- ☐ 70° (8)
- ☐ 80° (9)
- ☐ 90° (10)
- ☐ 100° - Very Warm (11)

Please rate how cold or warm you feel toward Asians (0 = coldest feelings, 50=neutral, 100 = warmest feelings)

- ☐ 0° - Very Cold (1)
- ☐ 10° (2)
- ☐ 20° (3)
- ☐ 30° (4)
- ☐ 40° (5)
- ☐ 50° (6)
- ☐ 60° (7)
- ☐ 70° (8)
- ☐ 80° (9)
- ☐ 90° (10)
- ☐ 100° - Very Warm (11)



Please rate how cold or warm you feel toward Latinos (0 = coldest feelings, 50=neutral, 100 = warmest feelings)

- ☐ 0° - Very Cold (1)
- ☐ 10° (2)
- ☐ 20° (3)
- ☐ 30° (4)
- ☐ 40° (5)
- ☐ 50° (6)
- ☐ 60° (7)
- ☐ 70° (8)
- ☐ 80° (9)
- ☐ 90° (10)
- ☐ 100° - Very Warm (11)

Please indicate the extent to which you agree or disagree with the following statements:

[illegible]

|                                                                                              |                       |                       |                       |                       |                       |                       |                       |
|----------------------------------------------------------------------------------------------|-----------------------|-----------------------|-----------------------|-----------------------|-----------------------|-----------------------|-----------------------|
| There are major barriers in society that continue to prevent poor people from moving up. (6) | <input type="radio"/> |
| Some racial groups face a massive disadvantage in society. (7)                               | <input type="radio"/> |

For the following questions, we are interested in your personal knowledge. Please do not look the answers up.

What is the term of a United States Senator?

- ☐ four years (1)
- ☐ two years (2)
- ☐ six years (3)
- ☐ five years (4)
- ☐ none of the above (5)

Who is the third in line to succession to the Presidency of the United States?

- ☐ Chief Justice of the Supreme Court (1)
- ☐ The Head of the Joint Chiefs of Staff (2)
- ☐ The Speaker of the House (3)
- ☐ The Majority Leader of the Senate (4)
- ☐ none of the above (5)

When did the Vietnam War end?

- ☐ 1945 (1)
- ☐ 1991 (2)
- ☐ 1955 (3)
- ☐ 1968 (4)
- ☐ None of the above (5)

Which European nation does not use the Euro as its national currency?

- ☐ Spain (1)
- ☐ The United Kingdom (2)
- ☐ France (3)
- ☐ Poland (4)
- ☐ None of the above (5)

What is the national language of Brazil?

- ☐ Spanish (1)
- ☐ English (2)
- ☐ Catalan (3)
- ☐ French (4)
- ☐ None of the above (5)

Who is the current French President?

- ☐ Francois Hollande (1)
- ☐ Nicolas Sarkozy (2)
- ☐ Dominique Strauss-Kahn (3)
- ☐ Marine Le Pen (4)
- ☐ None of the above (5)

Please indicate the extent to which you agree or disagree with the following statements:

|                                                                                                      | Strongly<br>Disagree<br>(1) (1) | 2 (2)                 | 3 (3)                 | 4 (4)                 | 5 (5)                 | 6 (6)                 | Strongly<br>Agree (7)<br>(7) |
|------------------------------------------------------------------------------------------------------|---------------------------------|-----------------------|-----------------------|-----------------------|-----------------------|-----------------------|------------------------------|
| Black-White<br>biracials face<br>discrimination<br>because of<br>their racial<br>background.<br>(1)  | <input type="radio"/>           | <input type="radio"/> | <input type="radio"/> | <input type="radio"/> | <input type="radio"/> | <input type="radio"/> | <input type="radio"/>        |
| Asian-White<br>biracials face<br>discrimination<br>because of<br>their racial<br>background.<br>(2)  | <input type="radio"/>           | <input type="radio"/> | <input type="radio"/> | <input type="radio"/> | <input type="radio"/> | <input type="radio"/> | <input type="radio"/>        |
| Latino-White<br>biracials face<br>discrimination<br>because of<br>their racial<br>background.<br>(3) | <input type="radio"/>           | <input type="radio"/> | <input type="radio"/> | <input type="radio"/> | <input type="radio"/> | <input type="radio"/> | <input type="radio"/>        |
| In general,<br>biracials face<br>discrimination<br>due to their<br>racial<br>background.<br>(4)      | <input type="radio"/>           | <input type="radio"/> | <input type="radio"/> | <input type="radio"/> | <input type="radio"/> | <input type="radio"/> | <input type="radio"/>        |

How many of your acquaintances are mixed race?

- ☐ None (1)
- ☐ A couple (2)
- ☐ Several (8)
- ☐ Many (9)
- ☐ Most of them (10)

How many of your friends are mixed race?

- ☐ None (1)
- ☐ A couple (2)
- ☐ Several (3)
- ☐ Many (4)
- ☐ Most of them (5)

How many of your close friends are mixed race?

- ☐ None (1)
- ☐ A couple (2)
- ☐ Several (3)
- ☐ Many (4)
- ☐ Most of them (5)

How many of your family members or relatives have married someone of a different race?

- ☐ None (1)
- ☐ A couple (2)
- ☐ Several (3)
- ☐ Many (4)
- ☐ Most of them (5)

How many of your family members or relatives are mixed race?

- ☐ None (1)
- ☐ A couple (2)
- ☐ Several (3)
- ☐ Many (4)
- ☐ Most of them (5)

How many of your fellow students or coworkers are mixed race?

- ☐ 1None0% (1)
- ☐ 2 (2)
- ☐ 3 (3)
- ☐ 450% (4)
- ☐ 5 (5)
- ☐ 6 (6)
- ☐ 7Almost all100% (7)

Please indicate the extent to which you agree or disagree with the following statements concerning biracials who are part minority and part White:

[illegible]

How would you describe your political party preference?

- ☐ Strong Republican (1)
- ☐ Weak Republican (2)
- ☐ Independent Republican (3)
- ☐ Independent (4)
- ☐ Independent Democrat (5)
- ☐ Weak Democrat (6)
- ☐ Strong Democrat (7)
- ☐ Other (please specify) (8) \_\_\_\_\_

In terms of economic issues, how would you describe your political attitudes and beliefs?

- ☐ Very Conservative (1)
- ☐ Conservative (2)
- ☐ Slightly Conservative (3)
- ☐ Middle-of-the-road (4)
- ☐ Slightly Liberal (5)
- ☐ Liberal (6)
- ☐ Very Liberal (7)
- ☐ Other (please specify) (8) \_\_\_\_\_

In terms of social issues, how would you describe your political attitude and beliefs?

- ☐ Very Conservative (1)
- ☐ Conservative (2)
- ☐ Slightly Conservative (3)
- ☐ Middle-of-the-road (4)
- ☐ Slightly Liberal (5)
- ☐ Liberal (6)
- ☐ Very Liberal (7)
- ☐ Other (please specify) (8) \_\_\_\_\_



[illegible]

|                                                                                                                 |                       |                       |                       |                       |                       |                       |                       |
|-----------------------------------------------------------------------------------------------------------------|-----------------------|-----------------------|-----------------------|-----------------------|-----------------------|-----------------------|-----------------------|
| As long as my ethnic group is doing OK, it doesn't matter to me where we stand relative to other groups.<br>(5) | <input type="radio"/> |
|-----------------------------------------------------------------------------------------------------------------|-----------------------|-----------------------|-----------------------|-----------------------|-----------------------|-----------------------|-----------------------|

What is your attitude toward biracials?

Some people believe that people can vary in how human-like they seem. That is, they believe that some people seem highly evolved whereas other seem no different than lower animals. Using the image below as a guide, indicate using the sliders how evolved you consider the average member of each group to be.

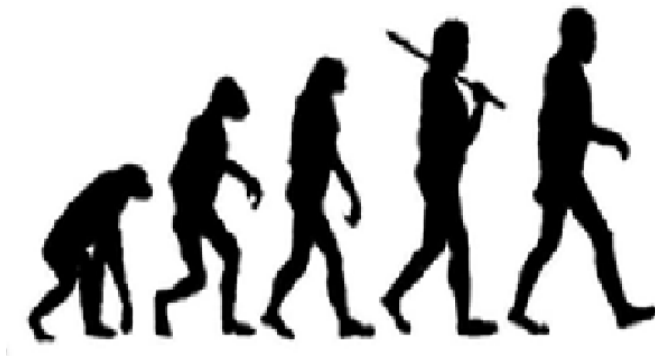

Please rate the following groups:

- \_\_\_\_\_ Asian Americans (1)
- \_\_\_\_\_ African Americans (2)
- \_\_\_\_\_ Latino Americans (3)
- \_\_\_\_\_ White Americans (4)
- \_\_\_\_\_ Asian-White Biracials (5)
- \_\_\_\_\_ Black-White Biracials (6)
- \_\_\_\_\_ Latino-White Biracials (7)

Were you born in the United States?

- ☐ Yes (1)
- ☐ No (2)

How many years have you lived in the United States?

How would you describe your family's social class position?

- ☐ Poor (1)
- ☐ Working class (2)
- ☐ Middle Class (3)
- ☐ Upper Middle Class (4)
- ☐ Upper Class (5)

What is the highest level of education your father has completed?

- ☐ No Formal Education (1)
- ☐ Elementary School (2)
- ☐ Some High School (3)
- ☐ Completed High School (4)
- ☐ Some College (5)
- ☐ BA/BS Degree (6)
- ☐ Some Graduate/Professional School (7)
- ☐ Hold Graduation/Professional Degree (8)
- ☐ Don't know (9)

What is the highest level of education your mother has completed?

- ☐ No Formal Education (1)
- ☐ Elementary School (2)
- ☐ Some High School (3)
- ☐ Completed High School (4)
- ☐ Some College (5)
- ☐ BA/BS Degree (6)
- ☐ Some Graduate/Professional School (7)
- ☐ Hold Graduation/Professional Degree (8)
- ☐ Don't know (9)

What is the highest level of education you have completed?

- ☐ No Formal Education (1)
- ☐ Elementary School (2)
- ☐ Some High School (3)
- ☐ Completed High School (4)
- ☐ Some College (5)
- ☐ BA/BS Degree (6)
- ☐ Some Graduate/Professional School (7)
- ☐ Hold Graduate/Professional Degree (8)

In the section of the survey where you were asked about political or historical facts, did you look any of the answers up?

- ☐ Yes (1)
- ☐ No (2)

In order to facilitate our research, we are interested in knowing certain factors about you. Specifically, we are interested in whether you actually take the time to read the directions; if not, then the data we collect based on your responses will be invalid. So, in order to demonstrate that you have read the instructions, please ignore the next question, and simply write "I read the instructions" in the box labeled "Any comments or questions?" Thank you very much.

How difficult did you find this survey?

- ☐ Very Difficult (8)
- ☐ Difficult (9)
- ☐ Somewhat Difficult (10)
- ☐ Neutral (11)
- ☐ Somewhat Easy (12)
- ☐ Easy (13)
- ☐ Very Easy (14)

Any comments or questions?

Please enter your MTurk ID number here:

Have you participated in this study previously? Note: At this point, your response to this question WILL NOT affect your compensation. That is, you will be compensated regardless of your answer, since you have already completed the study. However, to ensure the validity of our study, we need you to answer truthfully. Thank you for your cooperation.

- ☐ Yes, I have participated in this study before. (1)
- ☐ No, this is the FIRST TIME I have participated in this study. (2)

### **Study 1 Measures**

Show how much you favor or oppose each idea below. You can work quickly; your first feeling is generally best. Please note that some of the statements may seem repetitive. This is because we are developing new items, and your responses to this survey will help us determine which items are the best. Thanks in advance for your help with this.

- ☐ Strongly Oppose (1)
- ☐ Somewhat Oppose (2)
- ☐ Slightly Oppose (3)
- ☐ Neutral (4)
- ☐ Slightly Favor (5)
- ☐ Somewhat favor (6)
- ☐ Strongly favor (7)

Some groups of people must be kept in their place.

It's probably a good thing that certain groups are at the top and other groups are at the bottom.

An ideal society requires some groups to be on top and others to be on the bottom.

Some groups of people are simply inferior to other groups.

Groups at the bottom are just as deserving as groups at the top.

No one group should dominate in society.

Groups at the bottom should not have to stay in their place.

Group dominance is a poor principle.

We should not push for group equality.

We shouldn't try to guarantee that every group has the same quality of life.

It is unjust to try to make groups equal.

Group equality should not be our primary goal.

We should work to give all groups an equal chance to succeed.

We should do what we can to equalize conditions for different groups.

No matter how much effort it takes, we ought to strive to ensure that all groups have the same chance in life.

Group equality should be our ideal.

How strongly do you identify with other members of your racial group?

How important is your race to your identity?

How often do you think of yourself as a member of your racial group?

How close do you feel to other members of your racial group?

- ☐ 1-Not at all (1)
- ☐ 2 (2)
- ☐ 3 (3)
- ☐ 4 (4)
- ☐ 5 (5)
- ☐ 6 (6)
- ☐ 7-Very strongly (7)

|                                                                                                                                     | 1 - Not at all (1)    | 2 (2)                 | 3 (3)                 | 4 (4)                 | 5 (5)                 | 6 (6)                 | 7 - Very much (7)     |
|-------------------------------------------------------------------------------------------------------------------------------------|-----------------------|-----------------------|-----------------------|-----------------------|-----------------------|-----------------------|-----------------------|
| To what extent will prejudice and discrimination against members of your racial group impose barriers to their future outcomes? (1) | <input type="radio"/> |
| To what extent will prejudice and discrimination against you, because of your race, impose barriers to your future outcomes? (2)    | <input type="radio"/> |

Generally speaking, how much do you think people who are part-Asian and part-White want to identify as Asian?

Generally speaking, how much do you think people who are part-Asian and part-White want to identify as White?

- ☐ 1-Not at all (1)
- ☐ 2 (2)
- ☐ 3 (3)
- ☐ 4 (4)
- ☐ 5 (5)
- ☐ 6 (6)
- ☐ 7-Very much (7)





[illegible]



How would you agree or disagree with these statements:



Select Strongly Agree for this question.

- ☐ Strongly Disagree (1)
- ☐ Disagree (2)
- ☐ Somewhat Disagree (3)
- ☐ Neither Agree nor Disagree (4)
- ☐ Somewhat Agree (5)
- ☐ Agree (6)
- ☐ Strongly Agree (7)

Imagine a child with 2 Asian grandparents and 2 White grandparents...

To what extent do you consider this child to be Asian or White?

- ☐ Completely Asian (1)
- ☐ Predominantly Asian (2)
- ☐ Somewhat more Asian than White (3)
- ☐ Equally Asian and White (4)
- ☐ Somewhat more White than Asian (5)
- ☐ Predominantly White (6)
- ☐ Completely White (7)

If an Asian American and a White American have a kid...

Do you think the kid will look more like an Asian person or a White person?

- ☐ 1 - More Asian (1)
- ☐ 2 (2)
- ☐ 3 (3)
- ☐ 4 - Equally Asian and White (4)
- ☐ 5 (5)
- ☐ 6 (6)
- ☐ 7 - More White (7)

Will others likely label the kid as an Asian person or a White person, based on looks alone?

- ☐ 1 - More likely Asian (1)
- ☐ 2 (2)
- ☐ 3 (3)
- ☐ 4 - Equally likely Asian and White (4)
- ☐ 5 (5)
- ☐ 6 (6)
- ☐ 7 - More likely White (7)

Will the kid resemble his/her Asian parent or White parent more?

- ☐ 1 - More his/her Asian parent (1)
- ☐ 2 (2)
- ☐ 3 (3)
- ☐ 4 - Equally Asian and White parents (4)
- ☐ 5 (5)
- ☐ 6 (6)
- ☐ 7 - More his/her White Parent (7)

Overall, will the kid look more like other Asian people or other White people?

- ☐ 1 - More like Asian people (1)
- ☐ 2 (2)
- ☐ 3 (3)
- ☐ 4 - Equally like Asian and White people (4)
- ☐ 5 (5)
- ☐ 6 (6)
- ☐ 7 - More like White people (7)

If an Asian American and a White American have a kid...

Do you think the kid will act more like an Asian person or a White person?

- ☐ 1 - More Asian (1)
- ☐ 2 (2)
- ☐ 3 (3)
- ☐ 4 - Equally Asian and White (4)
- ☐ 5 (5)
- ☐ 6 (6)
- ☐ 7 - More White (7)

Should the kid act more like an Asian person or a White person?

- ☐ 1 - More Asian (1)
- ☐ 2 (2)
- ☐ 3 (3)
- ☐ 4 - Equally Asian and White (4)
- ☐ 5 (5)
- ☐ 6 (6)
- ☐ 7 - More White (7)

Will the kid's behavior lead those around to categorize him/her as Asian or White?

- ☐ 1 - As Asian (1)
- ☐ 2 (2)
- ☐ 3 (3)
- ☐ 4 - Equally Asian and White (4)
- ☐ 5 (5)
- ☐ 6 (6)
- ☐ 7 - As White (7)

Is the kid more likely to act in ways that can be identified with Asian culture or with White culture?

- ☐ 1 - More with Asian culture (1)
- ☐ 2 (2)
- ☐ 3 (3)
- ☐ 4 - Equally with Asian and White culture (4)
- ☐ 5 (5)
- ☐ 6 (6)
- ☐ 7 - More with White culture (7)

Should the kid act in ways that can be identified with Asian culture or with White culture?

- ☐ 1 - More with Asian culture (1)
- ☐ 2 (2)
- ☐ 3 (3)
- ☐ 4 - Equally with Asian and White culture (4)
- ☐ 5 (5)
- ☐ 6 (6)
- ☐ 7 - More with White culture (7)

Will the kid copy the actions of Asian or White celebrities more?

- ☐ 1 - More Asian (1)
- ☐ 2 (2)
- ☐ 3 (3)
- ☐ 4 - Equally Asian and White (4)
- ☐ 5 (5)
- ☐ 6 (6)
- ☐ 7 - More White (7)

If an Asian American and a White American have a kid...

Do you think the kid will fit in better with Asian people or White people?

- ☐ 1 - Better with Asians (1)
- ☐ 2 (2)
- ☐ 3 (3)
- ☐ 4 - Equally well with Asians and Whites (4)
- ☐ 5 (5)
- ☐ 6 (6)
- ☐ 7 - Better with Whites (7)

Do you think the kid will be accepted more by Asian people or by White people?

- ☐ 1 - More by Asians (1)
- ☐ 2 (2)
- ☐ 3 (3)
- ☐ 4 - Equally by Asians and Whites (4)
- ☐ 5 (5)
- ☐ 6 (6)
- ☐ 7 - More by Whites (7)

Do you think the kid will feel most comfortable hanging out with Asian people or White people?

- ☐ 1 - More comfortable with Asians (1)
- ☐ 2 (2)
- ☐ 3 (3)
- ☐ 4 - Equally comfortable with Asians and Whites (4)
- ☐ 5 (5)
- ☐ 6 (6)
- ☐ 7 - More comfortable with Whites (7)

Do you think the kid will end up hanging out with Asian people or with White people more?

- ☐ 1 - More with Asians (1)
- ☐ 2 (2)
- ☐ 3 (3)
- ☐ 4 - Equally with Asians and Whites (4)
- ☐ 5 (5)
- ☐ 6 (6)
- ☐ 7 - More with Whites (7)

Should the kid hang out with Asian people or with White people more?

- ☐ 1 - More with Asians (1)
- ☐ 2 (2)
- ☐ 3 (3)
- ☐ 4 - Equally with Asians and Whites (4)
- ☐ 5 (5)
- ☐ 6 (6)
- ☐ 7 - More with Whites (7)



If an Asian American and a White American have a kid...

Do you think the kid should be thought of as relatively Asian or relatively White?

- ☐ 1 - Relatively Asian (1)
- ☐ 2 (2)
- ☐ 3 (3)
- ☐ 4 - Equally Asian and White (4)
- ☐ 5 (5)
- ☐ 6 (6)
- ☐ 7 - Relatively White (7)

Will the kid give off the general impression of being more Asian or more White?

- ☐ 1 - More Asian (1)
- ☐ 2 (2)
- ☐ 3 (3)
- ☐ 4 - Equally Asian and White (4)
- ☐ 5 (5)
- ☐ 6 (6)
- ☐ 7 - More White (7)

Would you consider the kid more Asian or more White?

- ☐ 1 - More Asian (1)
- ☐ 2 (2)
- ☐ 3 (3)
- ☐ 4 - Equally Asian and White (4)
- ☐ 5 (5)
- ☐ 6 (6)
- ☐ 7 - More White (7)

Do you think the kid will be more like his/her Asian parent or his/her White parent?

- ☐ 1 - More like the Asian parent (1)
- ☐ 2 (2)
- ☐ 3 (3)
- ☐ 4 - Equally like the Asian and White parent (4)
- ☐ 5 (5)
- ☐ 6 (6)
- ☐ 7 - More like the White parent (7)

Should the kid be primarily thought of as an Asian person or White person?

- ☐ 1 - More as an Asian person (1)
- ☐ 2 (2)
- ☐ 3 (3)
- ☐ 4 - Equally as Asian and White (4)
- ☐ 5 (5)
- ☐ 6 (6)
- ☐ 7 - More as a White person (7)

Which racial group do you belong to?

- ☐ African American/Black (1)
- ☐ Asian/Asian American/Pacific Islander (2)
- ☐ Caucasian/White (3)
- ☐ Latino/Hispanic (4)
- ☐ Middle Eastern (5)
- ☐ Native American (6)
- ☐ Biracial/ Mixed Race (please specify) (7) \_\_\_\_\_

What is your ethnicity?

Where were you born?

- ☐ United States (1)
- ☐ Other (2) \_\_\_\_\_

What is your sex?

- ☐ Male (1)
- ☐ Female (2)

How old are you (in years)?

### **Study 1 Other Measures**

Imagine a child with 3 Asian grandparents and 1 White grandparent...

To what extent do you consider this child to be Asian or White?

- ☐ Completely Asian (1)
- ☐ Predominantly Asian (2)
- ☐ Somewhat more Asian than White (3)
- ☐ Equally Asian and White (4)
- ☐ Somewhat more White than Asian (5)
- ☐ Predominantly White (6)
- ☐ Completely White (7)

If the child needed to check only one census box for “race,” should he/she check “Asian” or “White”?

- ☐ 1 - He/she should check Asian (1)
- ☐ 2 - He/she should check White (2)

How many of your acquaintances are Asian-White mixed race?

- ☐ None (1)
- ☐ A couple (2)
- ☐ Several (8)
- ☐ Many (9)
- ☐ Most of them (10)

How many of your friends are Asian-White mixed race?

- ☐ None (1)
- ☐ A couple (2)
- ☐ Several (3)
- ☐ Many (4)
- ☐ Most of them (5)

How many of your close friends are Asian-White mixed race?

- ☐ None (1)
- ☐ A couple (2)
- ☐ Several (3)
- ☐ Many (4)
- ☐ Most of them (5)

How many of your fellow students are Asian-White mixed race?

- ☐ 1None0% (1)
- ☐ 2 (2)
- ☐ 3 (3)
- ☐ 450% (4)
- ☐ 5 (5)
- ☐ 6 (6)
- ☐ 7Almost all100% (7)

How many of your teachers/professors/deans are Asian-White biracial?

- ☐ 1None0% (1)
- ☐ 2 (2)
- ☐ 3 (3)
- ☐ 450% (4)
- ☐ 5 (5)
- ☐ 6 (6)
- ☐ 7Almost all100% (7)

Please read the following sentences and indicate your agreement or disagreement:

I think that Asians as a group, can successfully achieve political gains in America.

- ☐ Strongly Disagree (1)
- ☐ Disagree (2)
- ☐ Somewhat Disagree (3)
- ☐ Neither Agree nor Disagree (4)
- ☐ Somewhat Agree (5)
- ☐ Agree (6)
- ☐ Strongly Agree (7)

Asians are strong as a group and can achieve a lot together.

- ☐ Strongly Disagree (1)
- ☐ Disagree (2)
- ☐ Somewhat Disagree (3)
- ☐ Neither Agree nor Disagree (4)
- ☐ Somewhat Agree (5)
- ☐ Agree (6)
- ☐ Strongly Agree (7)

I think that Asians are capable of collectively doing things to reduce anti-Asian discrimination in America.

- ☐ Strongly Disagree (1)
- ☐ Disagree (2)
- ☐ Somewhat Disagree (3)
- ☐ Neither Agree nor Disagree (4)
- ☐ Somewhat Agree (5)
- ☐ Agree (6)
- ☐ Strongly Agree (7)

I think that Asians, as a group working together, can successfully raise social awareness about issues facing Asians in society.

- ☐ Strongly Disagree (1)
- ☐ Disagree (2)
- ☐ Somewhat Disagree (3)
- ☐ Neither Agree nor Disagree (4)
- ☐ Somewhat Agree (5)
- ☐ Agree (6)
- ☐ Strongly Agree (7)

Asians are an inherently capable people.

- ☐ Strongly Disagree (1)
- ☐ Disagree (2)
- ☐ Somewhat Disagree (3)
- ☐ Neither Agree nor Disagree (4)
- ☐ Somewhat Agree (5)
- ☐ Agree (6)
- ☐ Strongly Agree (7)

As a group, Asians are capable of achieving whatever they set out to do.

- ☐ Strongly Disagree (1)
- ☐ Disagree (2)
- ☐ Somewhat Disagree (3)
- ☐ Neither Agree nor Disagree (4)
- ☐ Somewhat Agree (5)
- ☐ Agree (6)
- ☐ Strongly Agree (7)

Asians are incapable of realizing their political ambitions.

- ☐ Strongly Disagree (1)
- ☐ Disagree (2)
- ☐ Somewhat Disagree (3)
- ☐ Neither Agree nor Disagree (4)
- ☐ Somewhat Agree (5)
- ☐ Agree (6)
- ☐ Strongly Agree (7)

Please read the following sentences and indicate your agreement or disagreement:

|                                                  | Strongly Disagree (1) | Disagree (2)          | Somewhat Disagree (3) | Neither Agree nor Disagree (4) | Somewhat Agree (5)    | Agree (6)             | Strongly Agree (7)    |
|--------------------------------------------------|-----------------------|-----------------------|-----------------------|--------------------------------|-----------------------|-----------------------|-----------------------|
| I share a common fate with other Asians. (1)     | <input type="radio"/> | <input type="radio"/> | <input type="radio"/> | <input type="radio"/>          | <input type="radio"/> | <input type="radio"/> | <input type="radio"/> |
| I perceive Asians across the country as one. (2) | <input type="radio"/> | <input type="radio"/> | <input type="radio"/> | <input type="radio"/>          | <input type="radio"/> | <input type="radio"/> | <input type="radio"/> |
| I feel similar to other Asians. (3)              | <input type="radio"/> | <input type="radio"/> | <input type="radio"/> | <input type="radio"/>          | <input type="radio"/> | <input type="radio"/> | <input type="radio"/> |
| Asians form a tight-knit group. (4)              | <input type="radio"/> | <input type="radio"/> | <input type="radio"/> | <input type="radio"/>          | <input type="radio"/> | <input type="radio"/> | <input type="radio"/> |
| Select Strongly Disagree for this item. (5)      | <input type="radio"/> | <input type="radio"/> | <input type="radio"/> | <input type="radio"/>          | <input type="radio"/> | <input type="radio"/> | <input type="radio"/> |

People from low status groups continue to suffer from discrimination in this country.

- ☐ Strongly Disagree (1)
- ☐ Disagree (2)
- ☐ Neither Agree nor Disagree (3)
- ☐ Agree (4)
- ☐ Strongly Agree (5)

Great inequality continues to exist in this country.

- ☐ Strongly Disagree (1)
- ☐ Disagree (2)
- ☐ Neither Agree nor Disagree (3)
- ☐ Agree (4)
- ☐ Strongly Agree (5)

If only people paid more attention, they would notice the subtle discrimination that is still widespread in this country.

- ☐ Strongly Disagree (1)
- ☐ Disagree (2)
- ☐ Neither Agree nor Disagree (3)
- ☐ Agree (4)
- ☐ Strongly Agree (5)

Despite claims to the contrary, women continue to face more injustice compared to men.

- ☐ Strongly Disagree (1)
- ☐ Disagree (2)
- ☐ Neither Agree nor Disagree (3)
- ☐ Agree (4)
- ☐ Strongly Agree (5)

Immigrants are not made to feel welcome in this country.

- ☐ Strongly Disagree (1)
- ☐ Disagree (2)
- ☐ Neither Agree nor Disagree (3)
- ☐ Agree (4)
- ☐ Strongly Agree (5)

There are major barriers in society that continue to prevent poor people from moving up.

- ☐ Strongly Disagree (1)
- ☐ Disagree (2)
- ☐ Neither Agree nor Disagree (3)
- ☐ Agree (4)
- ☐ Strongly Agree (5)

Some racial groups face a massive disadvantage in society.

- ☐ Strongly Disagree (1)
- ☐ Disagree (2)
- ☐ Neither Agree nor Disagree (3)
- ☐ Agree (4)
- ☐ Strongly Agree (5)

Groups at the top defend the social system just because it benefits them.

- ☐ Strongly Disagree (1)
- ☐ Disagree (2)
- ☐ Neither Agree nor Disagree (3)
- ☐ Agree (4)
- ☐ Strongly Agree (5)

Groups in power rig the system to keep themselves on top.

- ☐ Strongly Agree (1)
- ☐ Agree (2)
- ☐ Neither Agree nor Disagree (3)
- ☐ Disagree (4)
- ☐ Strongly Disagree (5)

Those in control rarely give other groups a fair chance to succeed.

- ☐ Strongly Disagree (1)
- ☐ Disagree (2)
- ☐ Neither Agree nor Disagree (3)
- ☐ Agree (4)
- ☐ Strongly Agree (5)

Those in power don't ever care about what happens to people at the bottom.

- ☐ Strongly Disagree (1)
- ☐ Disagree (2)
- ☐ Neither Agree nor Disagree (3)
- ☐ Agree (4)
- ☐ Strongly Agree (5)

Rich people and corporations fund politicians to guarantee that they will push for legislation in their favor.

- ☐ Strongly Disagree (1)
- ☐ Disagree (2)
- ☐ Neither Agree nor Disagree (3)
- ☐ Agree (4)
- ☐ Strongly Agree (5)

People who think there's a powerful elite that keeps the rest of society under their control are crazy.

- ☐ Strongly Disagree (1)
- ☐ Disagree (2)
- ☐ Neither Agree nor Disagree (3)
- ☐ Agree (4)
- ☐ Strongly Agree (5)

Groups at the bottom of the social hierarchy should stand up and challenge the authority of more dominant groups.

- ☐ Strongly Disagree (1)
- ☐ Disagree (2)
- ☐ Neither Agree nor Disagree (3)
- ☐ Agree (4)
- ☐ Strongly Agree (5)



Members of disadvantaged groups should fight their inferior position, rather than simply accept it.

- ☐ Strongly Disagree (1)
- ☐ Disagree (2)
- ☐ Neither Agree nor Disagree (3)
- ☐ Agree (4)
- ☐ Strongly Agree (5)

Members of disadvantaged groups should organize politically to pressure the system into giving them equal rights.

- ☐ Strongly Disagree (1)
- ☐ Disagree (2)
- ☐ Neither Agree nor Disagree (3)
- ☐ Agree (4)
- ☐ Strongly Agree (5)

It's only fair for low power groups to 'fight for their rights', when groups who've always had power don't want to share.

- ☐ Strongly Disagree (1)
- ☐ Disagree (2)
- ☐ Neither Agree nor Disagree (3)
- ☐ Agree (4)
- ☐ Strongly Agree (5)

There's no point in low status groups trying to change their group's position in the social system.

- ☐ Strongly Disagree (1)
- ☐ Disagree (2)
- ☐ Neither Agree nor Disagree (3)
- ☐ Agree (4)
- ☐ Strongly Agree (5)

The best way to respond to social inequality is for low power group members to leave their groups and move up into the ranks of dominant groups.

- ☐ Strongly Disagree (1)
- ☐ Disagree (2)
- ☐ Neither Agree nor Disagree (3)
- ☐ Agree (4)
- ☐ Strongly Agree (5)

Generally speaking, how much do you think people who are part-Asian and part-White want to identify as Mixed or Multiracial?

- ☐ 1-Not at all (1)
- ☐ 2 (2)
- ☐ 3 (3)
- ☐ 4 (4)
- ☐ 5 (5)
- ☐ 6 (6)
- ☐ 7-Very much (7)

|                                                                                      | 1 -<br>Strongly<br>disagree<br>(1) | 2 (2)                 | 3 (3)                 | 4 (4)                 | 5 (5)                 | 6 (6)                 | 7 -<br>Strongly<br>agree (7) |
|--------------------------------------------------------------------------------------|------------------------------------|-----------------------|-----------------------|-----------------------|-----------------------|-----------------------|------------------------------|
| If I knew a biracial person who wanted to identify as White, I would be annoyed. (1) | <input type="radio"/>              | <input type="radio"/> | <input type="radio"/> | <input type="radio"/> | <input type="radio"/> | <input type="radio"/> | <input type="radio"/>        |
| Biracials who want to identify as White are "selling out." (2)                       | <input type="radio"/>              | <input type="radio"/> | <input type="radio"/> | <input type="radio"/> | <input type="radio"/> | <input type="radio"/> | <input type="radio"/>        |
| It is disloyal of biracial individuals to identify as White. (3)                     | <input type="radio"/>              | <input type="radio"/> | <input type="radio"/> | <input type="radio"/> | <input type="radio"/> | <input type="radio"/> | <input type="radio"/>        |
| Biracials should not turn their backs on their minority parent group. (4)            | <input type="radio"/>              | <input type="radio"/> | <input type="radio"/> | <input type="radio"/> | <input type="radio"/> | <input type="radio"/> | <input type="radio"/>        |

Please indicate how much you agree or disagree with each statement:

Asian-White biracials are probably ashamed of their Asian half.

- ☐ Strongly Disagree (1)
- ☐ Disagree (2)
- ☐ Somewhat Disagree (3)
- ☐ Neither Agree nor Disagree (4)
- ☐ Somewhat Agree (5)
- ☐ Agree (6)
- ☐ Strongly Agree (7)

Asian-White biracials try to hide their Asian side from others.

- ☐ Strongly Disagree (1)
- ☐ Disagree (2)
- ☐ Somewhat Disagree (3)
- ☐ Neither Agree nor Disagree (4)
- ☐ Somewhat Agree (5)
- ☐ Agree (6)
- ☐ Strongly Agree (7)

Asian-White biracials think they are better than Asians.

- ☐ Strongly Disagree (1)
- ☐ Disagree (2)
- ☐ Somewhat Disagree (3)
- ☐ Neither Agree nor Disagree (4)
- ☐ Somewhat Agree (5)
- ☐ Agree (6)
- ☐ Strongly Agree (7)

Asian-White biracials think they don't have much in common with Asians.

- ☐ Strongly Disagree (1)
- ☐ Disagree (2)
- ☐ Somewhat Disagree (3)
- ☐ Neither Agree nor Disagree (4)
- ☐ Somewhat Agree (5)
- ☐ Agree (6)
- ☐ Strongly Agree (7)

Please read the following sentences and indicate your agreement or disagreement:

When Asian-White biracials are seen as White by society, it helps all Asians.

- ☐ Strongly Disagree (1)
- ☐ Disagree (2)
- ☐ Somewhat Disagree (3)
- ☐ Neither Agree nor Disagree (4)
- ☐ Somewhat Agree (5)
- ☐ Agree (6)
- ☐ Strongly Agree (7)

It can only be a good thing for Asians, as a group, when Asian-White biracial individuals use their Whiteness to get ahead.

- ☐ Strongly Disagree (1)
- ☐ Disagree (2)
- ☐ Somewhat Disagree (3)
- ☐ Neither Agree nor Disagree (4)
- ☐ Somewhat Agree (5)
- ☐ Agree (6)
- ☐ Strongly Agree (7)

It's harmful to Asians, as a group, when Asian-White biracials try to pass as White.

- ☐ Strongly Disagree (1)
- ☐ Disagree (2)
- ☐ Somewhat Disagree (3)
- ☐ Neither Agree nor Disagree (4)
- ☐ Somewhat Agree (5)
- ☐ Agree (6)
- ☐ Strongly Agree (7)

When Asian-White biracial individuals try to be seen as White in order to get ahead, it hurts the chances of Asians collectively achieving political gains in society.

- ☐ Strongly Disagree (1)
- ☐ Disagree (2)
- ☐ Somewhat Disagree (3)
- ☐ Neither Agree nor Disagree (4)
- ☐ Somewhat Agree (5)
- ☐ Agree (6)
- ☐ Strongly Agree (7)

If the child needed to check only one census box for "race," should he/she check "Asian" or "White"?

- ☐ 1 - He/she should check Asian (1)
- ☐ 2 - He/she should check White (2)

Imagine a child with 1 Asian grandparent and 3 White grandparents...

To what extent do you consider this child to be Asian or White?

- ☐ Completely Asian (1)
- ☐ Predominantly Asian (2)
- ☐ Somewhat more Asian than White (3)
- ☐ Equally Asian and White (4)
- ☐ Somewhat more White than Asian (5)
- ☐ Predominantly White (6)
- ☐ Completely White (7)

If the child needed to check only one census box for “race,” should he/she check “Asian” or “White”?

- ☐ 1 - He/she should check Asian (1)
- ☐ 2 - He/she should check White (2)

Which of the following images reflects how you see Asian people as they relate to Asian-White biracials?

- ☐ Image:Asnwht4 (1)
- ☐ Image:Asnwht3 (2)
- ☐ Image:Asnwht2 (3)
- ☐ (4)

Which of the following images reflects how you see White people as they relate to Asian-White biracials?

- ☐ Image:Whtasn4 (1)
- ☐ Image:Whtasn3 (2)
- ☐ Image:Whtasn2 (3)
- ☐ Image:Whtasn1 (4)

When you decide whether something is right or wrong, to what extent are the following considerations relevant to your thinking? Please rate each statement using this scale:[0] = not at all relevant (This consideration has nothing to do with my judgments of right and wrong) [1] = not very relevant [2] = slightly relevant [3] = somewhat relevant [4] = very relevant [5] = extremely relevant (This is one of the most important factors when I judge right and wrong)

- \_\_\_\_\_ Whether or not someone’s action showed love for his or her group (1)
- \_\_\_\_\_ Whether or not someone showed a lack of respect for authority (2)
- \_\_\_\_\_ Whether or not someone violated standards of purity and decency (3)
- \_\_\_\_\_ Whether or not someone did something to betray his or her group (4)
- \_\_\_\_\_ Whether or not someone conformed to the traditions of society (5)
- \_\_\_\_\_ Whether or not someone did something disgusting (6)
- \_\_\_\_\_ Whether or not someone showed a lack of loyalty (7)
- \_\_\_\_\_ Whether or not someone caused chaos or disorder (8)
- \_\_\_\_\_ Whether or not someone acted in a way that God would approve of (9)

Please read the following sentences and indicate your agreement or disagreement:

I am proud of my country's history.

- ☐ Strongly Disagree (1)
- ☐ Moderately Disagree (2)
- ☐ Slightly Disagree (3)
- ☐ Slightly Agree (4)
- ☐ Moderately Agree (5)
- ☐ Strongly Agree (6)

Respect for authority is something all children need to learn.

- ☐ Strongly Disagree (1)
- ☐ Moderately Disagree (2)
- ☐ Slightly Disagree (3)
- ☐ Slightly Agree (4)
- ☐ Moderately Agree (5)
- ☐ Strongly Agree (6)

People should not do things that are disgusting, even if no one is harmed.

- ☐ Strongly Disagree (1)
- ☐ Moderately Disagree (2)
- ☐ Slightly Disagree (3)
- ☐ Slightly Agree (4)
- ☐ Moderately Agree (5)
- ☐ Strongly Agree (6)

People should be loyal to their family members, even when they have done something wrong.

- ☐ Strongly Disagree (1)
- ☐ Moderately Disagree (2)
- ☐ Slightly Disagree (3)
- ☐ Slightly Agree (4)
- ☐ Moderately Agree (5)
- ☐ Strongly Agree (6)

Men and women each have different roles to play in society.

- ☐ Strongly Disagree (1)
- ☐ Moderately Disagree (2)
- ☐ Slightly Disagree (3)
- ☐ Slightly Agree (4)
- ☐ Moderately Agree (5)
- ☐ Strongly Agree (6)

I would call some acts wrong on the ground that they are unnatural.

- ☐ Strongly Disagree (1)
- ☐ Moderately Disagree (2)
- ☐ Slightly Disagree (3)
- ☐ Slightly Agree (4)
- ☐ Moderately Agree (5)
- ☐ Strongly Agree (6)

It is more important to be a team player than to express oneself.

- ☐ Strongly Disagree (1)
- ☐ Moderately Disagree (2)
- ☐ Slightly Disagree (3)
- ☐ Slightly Agree (4)
- ☐ Moderately Agree (5)
- ☐ Strongly Agree (6)

If I were a soldier and disagreed with my commanding officer's orders, I would obey anyway because that is my duty.

- ☐ Strongly Disagree (1)
- ☐ Moderately Disagree (2)
- ☐ Slightly Disagree (3)
- ☐ Slightly Agree (4)
- ☐ Moderately Agree (5)
- ☐ Strongly Agree (6)

Charity is an important and valuable virtue.

- ☐ Strongly Disagree (1)
- ☐ Moderately Disagree (2)
- ☐ Slightly Disagree (3)
- ☐ Slightly Agree (4)
- ☐ Moderately Agree (5)
- ☐ Strongly Agree (6)

It is important for Asian people to surround their children with Asian art, music and literature.

- ☐ Strongly Disagree (1)
- ☐ Disagree (2)
- ☐ Somewhat Disagree (3)
- ☐ Neither Agree nor Disagree (4)
- ☐ Somewhat Agree (5)
- ☐ Agree (6)
- ☐ Strongly Agree (7)



Asian people should not marry interracially.

- ☐ Strongly Disagree (1)
- ☐ Disagree (2)
- ☐ Neither Agree nor Disagree (3)
- ☐ Agree (4)
- ☐ Strongly Agree (5)

Asians would be better off if they adopted Asian values.

- ☐ Strongly Disagree (1)
- ☐ Disagree (2)
- ☐ Neither Agree nor Disagree (3)
- ☐ Agree (4)
- ☐ Strongly Agree (5)

Asian people must organize themselves into a separate Asian political force.

- ☐ Strongly Disagree (1)
- ☐ Disagree (2)
- ☐ Neither Agree nor Disagree (3)
- ☐ Agree (4)
- ☐ Strongly Agree (5)

Whenever possible, Asians should buy from other Asian businesses.

- ☐ Strongly Disagree (1)
- ☐ Disagree (2)
- ☐ Neither Agree nor Disagree (3)
- ☐ Agree (4)
- ☐ Strongly Agree (5)

A thorough knowledge of Asian history is very important for Asians today.

- ☐ Strongly Disagree (1)
- ☐ Disagree (2)
- ☐ Neither Agree nor Disagree (3)
- ☐ Agree (4)
- ☐ Strongly Agree (5)

Asians and Whites can never live in true harmony because of racial differences.

- ☐ Strongly Disagree (1)
- ☐ Disagree (2)
- ☐ Neither Agree nor Disagree (3)
- ☐ Agree (4)
- ☐ Strongly Agree (5)

Asian people can never truly trust White people's intentions.

- ☐ Strongly Disagree (1)
- ☐ Disagree (2)
- ☐ Neither Agree nor Disagree (3)
- ☐ Agree (4)
- ☐ Strongly Agree (5)

Asian college students should participate in ethnic organizations on campus.

- ☐ Strongly Disagree (1)
- ☐ Disagree (2)
- ☐ Neither Agree nor Disagree (3)
- ☐ Agree (4)
- ☐ Strongly Agree (5)

Asian college students should try to room with other Asian students whenever possible.

- ☐ Strongly Disagree (1)
- ☐ Disagree (2)
- ☐ Neither Agree nor Disagree (3)
- ☐ Agree (4)
- ☐ Strongly Agree (5)

How seriously have you considered participating in the following activities on behalf of your racial group?

|                                                                                                                                           | 1-Not at all<br>seriously (1) | 2 (2)                 | 3 (3)                 | 4 (4)                 | 5-Very<br>seriously<br>(have done so)<br>(5) |
|-------------------------------------------------------------------------------------------------------------------------------------------|-------------------------------|-----------------------|-----------------------|-----------------------|----------------------------------------------|
| 1. Joining an<br>race-based<br>organization<br>(1)                                                                                        | <input type="radio"/>         | <input type="radio"/> | <input type="radio"/> | <input type="radio"/> | <input type="radio"/>                        |
| 2. Voting in<br>terms of what<br>is good for<br>your particular<br>racial group<br>(2)                                                    | <input type="radio"/>         | <input type="radio"/> | <input type="radio"/> | <input type="radio"/> | <input type="radio"/>                        |
| 3. Participating<br>in<br>demonstrations<br>(3)                                                                                           | <input type="radio"/>         | <input type="radio"/> | <input type="radio"/> | <input type="radio"/> | <input type="radio"/>                        |
| 4. Signing<br>petitions (4)                                                                                                               | <input type="radio"/>         | <input type="radio"/> | <input type="radio"/> | <input type="radio"/> | <input type="radio"/>                        |
| 5. Sending<br>letters to<br>government<br>officials or<br>organizations<br>(5)                                                            | <input type="radio"/>         | <input type="radio"/> | <input type="radio"/> | <input type="radio"/> | <input type="radio"/>                        |
| 6. Going door-<br>to-door or<br>telephoning to<br>enlist public<br>support for<br>initiatives that<br>benefit your<br>racial group<br>(6) | <input type="radio"/>         | <input type="radio"/> | <input type="radio"/> | <input type="radio"/> | <input type="radio"/>                        |

How would you agree or disagree with these statements:

|                                                                                                                                  | Strongly<br>Disagree<br>(1) | Disagree<br>(2)       | Somewhat<br>Disagree<br>(3) | Neither<br>Agree nor<br>Disagree<br>(4) | Somewhat<br>Agree (5) | Agree<br>(6)          | Strongly<br>Agree (7) |
|----------------------------------------------------------------------------------------------------------------------------------|-----------------------------|-----------------------|-----------------------------|-----------------------------------------|-----------------------|-----------------------|-----------------------|
| The same racial categories have pretty much always existed. (1)                                                                  | <input type="radio"/>       | <input type="radio"/> | <input type="radio"/>       | <input type="radio"/>                   | <input type="radio"/> | <input type="radio"/> | <input type="radio"/> |
| Young children probably learn about which people fall into which racial groups automatically, without much help from adults. (2) | <input type="radio"/>       | <input type="radio"/> | <input type="radio"/>       | <input type="radio"/>                   | <input type="radio"/> | <input type="radio"/> | <input type="radio"/> |
| In 200 years, society will use basically the same racial categories. (3)                                                         | <input type="radio"/>       | <input type="radio"/> | <input type="radio"/>       | <input type="radio"/>                   | <input type="radio"/> | <input type="radio"/> | <input type="radio"/> |

## Study 2 Measures

Which racial/ethnic group do you belong to?

- ☐ African American/Black (1)
  - ☐ Asian/Asian American/Pacific Islander (2)
  - ☐ Caucasian/White (3)
  - ☐ Latino/Hispanic (4)
  - ☐ Middle Eastern (5)
  - ☐ Native American (6)
  - ☐ Biracial/ Mixed Race (please specify) (7) \_\_\_\_\_
  - ☐ Other (please specify) (8) \_\_\_\_\_
- 

What is your ethnic background?

---

What is your gender?

- ☐ Male (1)
  - ☐ Female (2)
  - ☐ Other (3) \_\_\_\_\_
- 

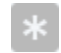

How old are you (in years)?

---

In what country were you born?

- ☐ United States (1)
  - ☐ Other (2) \_\_\_\_\_
-

Do you consider the <st1:country-region w:st="on"><st1:place w:st="on">United States</st1:place></st1:country-region> to be your native country? If not, please specify your native country.

- ☐ Yes (1)
  - ☐ No (2) \_\_\_\_\_
- 

<p>What is the highest level of education you have completed?</p>

- ☐ No Formal Education (1)
  - ☐ Elementary School (2)
  - ☐ Some High School (3)
  - ☐ Completed High School (4)
  - ☐ Some College (5)
  - ☐ BA/BS Degree (6)
  - ☐ Some Graduate/Professional School (7)
  - ☐ Hold Graduation/Professional Degree (8)
- 

<p>What is the highest level of education your father has completed?</p>

- ☐ No Formal Education (1)
  - ☐ Elementary School (2)
  - ☐ Some High School (3)
  - ☐ Completed High School (4)
  - ☐ Some College (5)
  - ☐ BA/BS Degree (6)
  - ☐ Some Graduate/Professional School (7)
  - ☐ Hold Graduation/Professional Degree (8)
-

<p>What is the highest level of education your mother has completed?</p>

- ☐ No Formal Education (1)
- ☐ Elementary School (2)
- ☐ Some High School (3)
- ☐ Completed High School (4)
- ☐ Some College (5)
- ☐ BA/BS Degree (6)
- ☐ Some Graduate/Professional School (7)
- ☐ Hold Graduation/Professional Degree (8)

### **Asian Participant Measures**

To what extent will prejudice and discrimination against members of your racial group impose barriers to their future outcomes?

- ☐ None 1 (1)
  - ☐ 2 (2)
  - ☐ 3 (3)
  - ☐ 4 (4)
  - ☐ 5 (5)
  - ☐ 6 (6)
  - ☐ A lot 7 (7)
- 

To what extent will prejudice and discrimination against you, because of your race, impose barriers to your future outcomes?

- ☐ None 1 (1)
  - ☐ 2 (2)
  - ☐ 3 (3)
  - ☐ 4 (4)
  - ☐ 5 (5)
  - ☐ 6 (6)
  - ☐ A lot 7 (7)
-

In your opinion, how much discrimination do Asians face in America today?

- ☐ None 1 (1)
  - ☐ 2 (2)
  - ☐ 3 (3)
  - ☐ 4 (4)
  - ☐ 5 (5)
  - ☐ 6 (6)
  - ☐ A lot 7 (7)
- 

Asian Americans rarely face racial discrimination.

- ☐ Strongly disagree 1 (1)
- ☐ 2 (2)
- ☐ 3 (3)
- ☐ 4 (4)
- ☐ 5 (5)
- ☐ 6 (6)
- ☐ Strongly agree 7 (7)

Generally speaking, how do you think people who are half Asian and half White want to identify?

- ☐ As more Asian 1 (1)
  - ☐ 2 (2)
  - ☐ 3 (3)
  - ☐ As Equally Asian and White 4 (4)
  - ☐ 5 (5)
  - ☐ 6 (6)
  - ☐ As more White 7 (7)
-



Generally speaking, how do you think people who are half Asian and half White want to be seen?

- ☐ As more Asian 1 (1)
- ☐ 2 (2)
- ☐ 3 (3)
- ☐ As Equally Asian and White 4 (4)
- ☐ 5 (5)
- ☐ 6 (6)
- ☐ As more White 7 (7)

In general, Asian-White biracials probably take sides with...

- ☐ Asians 1 (1)
  - ☐ 2 (2)
  - ☐ 3 (3)
  - ☐ Asians and Whites equally 4 (4)
  - ☐ 5 (5)
  - ☐ 6 (6)
  - ☐ Whites 7 (7)
- 

In general, Asian-White biracials probably care more about...

- ☐ Asians 1 (1)
  - ☐ 2 (2)
  - ☐ 3 (3)
  - ☐ Asians and Whites equally 4 (4)
  - ☐ 5 (5)
  - ☐ 6 (6)
  - ☐ Whites 7 (7)
-

In general, Asian-White biracials will primarily look out for the interests of...

- ☐ Asians 1 (1)
  - ☐ 2 (2)
  - ☐ 3 (3)
  - ☐ Asians and Whites equally 4 (4)
  - ☐ 5 (5)
  - ☐ 6 (6)
  - ☐ Whites 7 (7)
- 

In general, Asian-White biracials will be more loyal to...

- ☐ Asians 1 (1)
- ☐ 2 (2)
- ☐ 3 (3)
- ☐ Asians and Whites equally 4 (4)
- ☐ 5 (5)
- ☐ 6 (6)
- ☐ Whites 7 (7)

If an Asian American and a White American have a kid, would you think of the kid as relatively Asian or relatively White?

- ☐ Relatively Asian 1 (1)
  - ☐ 2 (2)
  - ☐ 3 (3)
  - ☐ Equally Asian and White 4 (4)
  - ☐ 5 (5)
  - ☐ 6 (6)
  - ☐ Relatively White 7 (7)
-

If an Asian American and a White American have a kid, would you consider the kid more Asian or more White?

- ☐ More Asian 1 (1)
  - ☐ 2 (2)
  - ☐ 3 (3)
  - ☐ Equally Asian and White 4 (4)
  - ☐ 5 (5)
  - ☐ 6 (6)
  - ☐ More White 7 (7)
- 

If an Asian American and a White American have a kid, how would you categorize this child?

- ☐ As Asian 1 (1)
- ☐ 2 (2)
- ☐ 3 (3)
- ☐ As equally Asian and White 4 (4)
- ☐ 5 (5)
- ☐ 6 (6)
- ☐ As White 7 (7)

Show how much you favor or oppose each idea below by selecting a number from 1 to 7 on the scale below. You can work quickly; your first feeling is generally best.

[illegible]



|                                                                                                                            |  |  |  |  |  |  |  |
|----------------------------------------------------------------------------------------------------------------------------|--|--|--|--|--|--|--|
| It is unjust to try to make groups equal.<br>(SDO_11)                                                                      |  |  |  |  |  |  |  |
| Group equality should not be our primary goal.<br>(SDO_12)                                                                 |  |  |  |  |  |  |  |
| We should work to give all groups an equal chance to succeed.<br>(SDO_13)                                                  |  |  |  |  |  |  |  |
| We should do what we can to equalize conditions for different groups.<br>(SDO_14)                                          |  |  |  |  |  |  |  |
| No matter how much effort it takes, we ought to strive to ensure that all groups have the same chance in life.<br>(SDO_15) |  |  |  |  |  |  |  |

|                                                          |                       |                       |                       |                       |                       |                       |                       |
|----------------------------------------------------------|-----------------------|-----------------------|-----------------------|-----------------------|-----------------------|-----------------------|-----------------------|
| Group<br>equality<br>should be<br>our ideal.<br>(SDO_16) | <input type="radio"/> |
|----------------------------------------------------------|-----------------------|-----------------------|-----------------------|-----------------------|-----------------------|-----------------------|-----------------------|

<div style="text-align: center; "><em><strong>We are all members of different social groups or social categories. We would like you to consider your race or ethnicity (e.g., African-American, Latino/Latina, Asian or Asian-American, Native Hawaiian/Pacific Islander, European-American, etc.) in responding to the following statements. Please indicate the extent to which you agree with each statement using the following scale:</strong></em></div> <div><br /> </div>

---

Overall, my ethnicity/race has very little to do with how I feel about myself.

- ☐ StronglyDisagree (1)
  - ☐ Disagree (2)
  - ☐ SomewhatDisagree (3)
  - ☐ Neutral (4)
  - ☐ SomewhatAgree (5)
  - ☐ Agree (6)
  - ☐ StronglyAgree (7)
  - ☐ Decline toAnswer (8)
-



In general, belonging to my ethnic/racial group is an important part of my self-image.

- ☐ StronglyDisagree (1)
  - ☐ Disagree (2)
  - ☐ SomewhatDisagree (3)
  - ☐ Neutral (4)
  - ☐ SomewhatAgree (5)
  - ☐ Agree (6)
  - ☐ StronglyAgree (7)
  - ☐ Decline toAnswer (8)
- 

The racial/ethnic group I belong to is unimportant to my sense of what kind of person I am.

- ☐ StronglyDisagree (1)
  - ☐ Disagree (2)
  - ☐ SomewhatDisagree (3)
  - ☐ Neutral (4)
  - ☐ SomewhatAgree (5)
  - ☐ Agree (6)
  - ☐ StronglyAgree (7)
  - ☐ Decline toAnswer (8)
- 

The racial/ethnic group I belong to is an important reflection of who I am.

- ☐ StronglyDisagree (1)
- ☐ Disagree (2)
- ☐ SomewhatDisagree (3)
- ☐ Neutral (4)
- ☐ SomewhatAgree (5)
- ☐ Agree (6)
- ☐ StronglyAgree (7)
- ☐ Decline toAnswer (8)

**Black Participant Measures (if different from above)**

To what extent will prejudice and discrimination against members of your racial group impose barriers to their future outcomes?

- ☐ None 1 (1)
  - ☐ 2 (2)
  - ☐ 3 (3)
  - ☐ 4 (4)
  - ☐ 5 (5)
  - ☐ 6 (6)
  - ☐ A lot 7 (7)
- 

To what extent will prejudice and discrimination against you, because of your race, impose barriers to your future outcomes?

- ☐ None 1 (1)
  - ☐ 2 (2)
  - ☐ 3 (3)
  - ☐ 4 (4)
  - ☐ 5 (5)
  - ☐ 6 (6)
  - ☐ A lot 7 (7)
- 

In your opinion, how much discrimination do Blacks face in America today?

- ☐ None 1 (1)
  - ☐ 2 (2)
  - ☐ 3 (3)
  - ☐ 4 (4)
  - ☐ 5 (5)
  - ☐ 6 (6)
  - ☐ A lot 7 (7)
-

African Americans rarely face racial discrimination.

- ☐ Strongly disagree 1 (1)
- ☐ 2 (2)
- ☐ 3 (3)
- ☐ 4 (4)
- ☐ 5 (5)
- ☐ 6 (6)
- ☐ Strongly agree 7 (7)

Generally speaking, how do you think people who are half Black and half White want to identify?

- ☐ As more Black 1 (1)
  - ☐ 2 (2)
  - ☐ 3 (3)
  - ☐ As Equally Black and White 4 (4)
  - ☐ 5 (5)
  - ☐ 6 (6)
  - ☐ As more White 7 (7)
- 

Generally speaking, how do you think people who are half Black and half White want to be seen?

- ☐ As more Black 1 (1)
- ☐ 2 (2)
- ☐ 3 (3)
- ☐ As Equally Black and White 4 (4)
- ☐ 5 (5)
- ☐ 6 (6)
- ☐ As more White 7 (7)

In general, Black-White biracials probably take sides with...

- ☐ Blacks 1 (1)
  - ☐ 2 (2)
  - ☐ 3 (3)
  - ☐ Blacks and Whites equally 4 (4)
  - ☐ 5 (5)
  - ☐ 6 (6)
  - ☐ Whites 7 (7)
- 

In general, Black-White biracials probably care more about...

- ☐ Blacks 1 (1)
  - ☐ 2 (2)
  - ☐ 3 (3)
  - ☐ Blacks and Whites equally 4 (4)
  - ☐ 5 (5)
  - ☐ 6 (6)
  - ☐ Whites 7 (7)
- 

In general, Black-White biracials will primarily look out for the interests of...

- ☐ Blacks 1 (1)
  - ☐ 2 (2)
  - ☐ 3 (3)
  - ☐ Blacks and Whites equally 4 (4)
  - ☐ 5 (5)
  - ☐ 6 (6)
  - ☐ Whites 7 (7)
-

In general, Black-White biracials will be more loyal to...

- ☐ Blacks 1 (1)
- ☐ 2 (2)
- ☐ 3 (3)
- ☐ Blacks and Whites equally 4 (4)
- ☐ 5 (5)
- ☐ 6 (6)
- ☐ Whites 7 (7)

If a Black American and a White American have a kid, would you think of the kid as relatively Black or relatively White?

- ☐ Relatively Black 1 (1)
  - ☐ 2 (2)
  - ☐ 3 (3)
  - ☐ Equally Black and White 4 (4)
  - ☐ 5 (5)
  - ☐ 6 (6)
  - ☐ Relatively White 7 (7)
- 

If a Black American and a White American have a kid, would you consider the kid more Black or more White?

- ☐ More Black 1 (1)
  - ☐ 2 (2)
  - ☐ 3 (3)
  - ☐ Equally Black and White 4 (4)
  - ☐ 5 (5)
  - ☐ 6 (6)
  - ☐ More White 7 (7)
-

If a Black American and a White American have a kid, how would you categorize this child?

- ☐ As Black 1 (1)
- ☐ 2 (2)
- ☐ 3 (3)
- ☐ As equally Black and White 4 (4)
- ☐ 5 (5)
- ☐ 6 (6)
- ☐ As White 7 (7)

Study 3 Materials and Measures

High discrimination condition manipulation text

RACISM AGAINST ASIAN AMERICANS PERSISTS IN THE U.S.

BY: J. L. HALEY  
ASSOCIATED PRESS

Data collected in 2011 by the California Research Consortium reveals that Asian Americans face widespread discrimination in many important areas of life. The study, which surveyed 5,000 current University of California (UC) undergraduates and 5,000 alumni who graduated between 1997 and 2005, revealed that Asian Americans routinely face racism and inequality in employment, salary, politics, and in everyday interpersonal interactions.

ASIAN AMERICANS PAID LESS THAN WHITES

The survey revealed that among the UC alumni, Asian Americans earned only 75% of what Whites earned, even for the same job. This is true even when they had equal amounts of education and experience. For example, among the 2004 UC graduates who majored in business administration, the average starting salary for Asian Americans was \$9,575 less than it was for Whites. Furthermore, statistical analyses based upon data from the recent UC graduates revealed

that the average Asian American graduating in the year 2008 is projected to make approximately \$483,000 less than the average White UC graduate is projected to earn over the course of a life.

ASIAN AMERICANS LESS LIKELY TO BE PROMOTED

The survey also found that Asian American UC graduates were less likely than White UC graduates to attain high-status work positions. Less than 15% of the Asian American graduates held positions that involved supervising more than 10 employees. In contrast, 68% of White graduates held positions where they supervised more than 10 employees. The promotion rates of White graduates were twice as high as Asian American graduates.

*Nearly 65% of the surveyed Whites would be extremely upset if their supervisor was an Asian American.*

— California Research Consortium

RACIST ATTITUDES STILL PREVALENT

The data also showed that negative stereotypes about Asian Americans have remained pervasive in recent years. Between 80% and 85% of the surveyed Whites held racist attitudes. Most admitted they would rather have White colleagues than Asian American

colleagues. Whites generally also rated Asian Americans as having poor leadership skills and as being overly emotional and less competent. Nearly 65% of the surveyed Whites said they would be extremely upset if their supervisor was an Asian American.

RACIST REMARKS COMMON

Additionally, the survey revealed that 50% of current UC Asian American students reported experiencing some form of racism from White students, faculty, and work supervisors. Asian American students were also eight times more likely than White students to report hearing assumptions made about their personal and academic interests, to be the target of derogatory remarks, and to be treated disrespectfully because of their race.

“ACTION NEEDED”

Following these new findings, a number of Asian American civil rights activists have called for racial solidarity and political action among Asian Americans. In a recent Sacramento Bee op-ed, Edward Chang of the Asian American Legal Consortium wrote, “The only way we can promote positive social change and address this pervasive discrimination is to stand together and enlist the support of political leaders by getting them to see that Asian Americans are politically active and represent an important, growing voting bloc that is too large to ignore.”

## RACISM: A THING OF THE PAST IN THE U.S.

BY: J. L. HALEY  
ASSOCIATED PRESS

Data collected in 2011 by the California Research Consortium reveals that discrimination against Asian Americans has all but disappeared in most important areas of life. The study, which surveyed 5,000 current University of California (UC) undergraduates and 5,000 alumni who graduated between 1997 and 2005, revealed that most Asian Americans never encountered racism. Asian Americans now have the same opportunities for advancement as do Whites in employment, salary, and politics.

### ASIAN AMERICANS PAID THE SAME AS WHITES

The survey revealed that among the UC alumni, Asian Americans earned the same income as Whites earned when doing the same job. For example, among the 2004 UC graduates who majored in business administration, the average starting salary for Asian Americans in business was identical to the average starting salary offered to Whites in business. Furthermore, statistical analyses based upon data from recent UC graduates revealed that the average Asian American graduating in the year 2004 is projected to make approximately the same amount of

money during her working life as the average White UC graduate is projected to earn.

### ASIAN AMERICANS JUST AS LIKELY TO BE PROMOTED

The survey also found that Asian American UC graduates were as likely as White UC graduates to attain high-status work positions. Approximately 65% of both Asian American and White graduates held positions that involved supervising more than 10 employees. There was no difference in the promotion rates of White and Asian American UC graduates.

*None of the surveyed Whites reported that they would be upset if their supervisor was an Asian American.*

*— California Research Consortium*

### RACIST ATTITUDES DISAPPEARING

The data also showed that negative stereotypes about Asian Americans have diminished dramatically in recent years. Only 7% of the surveyed Whites held racist attitudes and even fewer said they would rather have White colleagues than Asian American colleagues. Whites generally rated Asian Americans as being as hardworking and competent as Whites. None of the surveyed Whites reported that they would be upset if their supervisor was an Asian American.

### RACIST REMARKS RARE

Additionally, the survey revealed that 90% of current UC Asian American students reported never experiencing any form of racism from White students, faculty, and work supervisors. Asian American students reported that they were rarely the target of derogatory remarks and disrespectful treatment because of their race.

### PLEASANT SURPRISE

Following these new findings, a number of Asian American civil rights activists have proclaimed a new day for Asian Americans. In a recent Sacramento Bee op-ed, Edward Chang of the Asian American Legal Consortium wrote, "Whereas Asian Americans once faced pervasive barriers to success, we not represent an important and growing population in the U.S. These new findings further confirm what many of us have experienced – an open society that provides for opportunity regardless of race or ethnic origin."



Please answer the following questions based on the article you just read.

Who is more likely to be paid more?

- ☐ Whites (1)
- ☐ Asian Americans (2)
- ☐ Whites and Asian Americans equally (3)

Who is more likely to be promoted?

- ☐ Asian Americans (1)
- ☐ Whites (2)
- ☐ Whites and Asian Americans equally (3)

How often does discrimination toward Asian Americans occur?

- ☐ Almost never (1)
- ☐ Occasionally (2)
- ☐ Frequently (3)

Generally speaking, how much do you think people who are part-Asian and part-White want to identify as Asian?

- ☐ 1-Not at all (1)
- ☐ 2 (2)
- ☐ 3 (3)
- ☐ 4 (4)
- ☐ 5 (5)
- ☐ 6 (6)
- ☐ 7-Very much (7)

Generally speaking, how much do you think people who are part-Asian and part-White want to identify as White?

- ☐ 1-Not at all (1)
- ☐ 2 (2)
- ☐ 3 (3)
- ☐ 4 (4)
- ☐ 5 (5)
- ☐ 6 (6)
- ☐ 7-Very much (7)

[illegible]



How would you agree or disagree with these statements:

|                                                                                                                                                                               | Strongly<br>Disagree<br>(1) | Disagree<br>(2)       | Somewhat<br>Disagree<br>(3) | Neither<br>Agree nor<br>Disagree<br>(4) | Somewhat<br>Agree (5) | Agree (6)             | Strongly<br>Agree (7) |
|-------------------------------------------------------------------------------------------------------------------------------------------------------------------------------|-----------------------------|-----------------------|-----------------------------|-----------------------------------------|-----------------------|-----------------------|-----------------------|
| Asian-<br>White<br>biracials<br>should do<br>what's best<br>for<br>themselves<br>as<br>individuals,<br>even if it<br>means<br>distancing<br>themselves<br>from<br>Asians. (1) | <input type="radio"/>       | <input type="radio"/> | <input type="radio"/>       | <input type="radio"/>                   | <input type="radio"/> | <input type="radio"/> | <input type="radio"/> |
| Asian-<br>White<br>biracials<br>should<br>align<br>themselves<br>with<br>Whites if it<br>will help<br>them get<br>ahead. (2)                                                  | <input type="radio"/>       | <input type="radio"/> | <input type="radio"/>       | <input type="radio"/>                   | <input type="radio"/> | <input type="radio"/> | <input type="radio"/> |

Imagine a child with 2 Asian grandparents and 2 White grandparents...

To what extent do you consider this child to be Asian or White?

- ☐ Completely Asian (1)
- ☐ Predominantly Asian (2)
- ☐ Somewhat more Asian than White (3)
- ☐ Equally Asian and White (4)
- ☐ Somewhat more White than Asian (5)
- ☐ Predominantly White (6)
- ☐ Completely White (7)

If the child needed to check only one census box for “race,” should he/she check “Asian” or “White”?

- ☐ 1 - He/she should check Asian (1)
- ☐ 2 - He/she should check White (2)

If an Asian American and a White American have a kid...

Do you think the kid will look more like an Asian person or a White person?

- ☐ 1 - More Asian (1)
- ☐ 2 (2)
- ☐ 3 (3)
- ☐ 4 - Equally Asian and White (4)
- ☐ 5 (5)
- ☐ 6 (6)
- ☐ 7 - More White (7)

Will others likely label the kid as an Asian person or a White person, based on looks alone?

- ☐ 1 - More likely Asian (1)
- ☐ 2 (2)
- ☐ 3 (3)
- ☐ 4 - Equally likely Asian and White (4)
- ☐ 5 (5)
- ☐ 6 (6)
- ☐ 7 - More likely White (7)

Will the kid resemble his/her Asian parent or White parent more?

- ☐ 1 - More his/her Asian parent (1)
- ☐ 2 (2)
- ☐ 3 (3)
- ☐ 4 - Equally Asian and White parents (4)
- ☐ 5 (5)
- ☐ 6 (6)
- ☐ 7 - More his/her White Parent (7)

Overall, will the kid look more like other Asian people or other White people?

- ☐ 1 - More like Asian people (1)
- ☐ 2 (2)
- ☐ 3 (3)
- ☐ 4 - Equally like Asian and White people (4)
- ☐ 5 (5)
- ☐ 6 (6)
- ☐ 7 - More like White people (7)

If an Asian American and a White American have a kid...

Do you think the kid will act more like an Asian person or a White person?

- ☐ 1 - More Asian (1)
- ☐ 2 (2)
- ☐ 3 (3)
- ☐ 4 - Equally Asian and White (4)
- ☐ 5 (5)
- ☐ 6 (6)
- ☐ 7 - More White (7)

Will the kid's behavior lead those around to categorize him/her as Asian or White?

- ☐ 1 - As Asian (1)
- ☐ 2 (2)
- ☐ 3 (3)
- ☐ 4 - Equally Asian and White (4)
- ☐ 5 (5)
- ☐ 6 (6)
- ☐ 7 - As White (7)

Is the kid more likely to act in ways that can be identified with Asian culture or with White culture?

- ☐ 1 - More with Asian culture (1)
- ☐ 2 (2)
- ☐ 3 (3)
- ☐ 4 - Equally with Asian and White culture (4)
- ☐ 5 (5)
- ☐ 6 (6)
- ☐ 7 - More with White culture (7)

Will the kid copy the actions of Asian or White celebrities more?

- ☐ 1 - More Asian (1)
- ☐ 2 (2)
- ☐ 3 (3)
- ☐ 4 - Equally Asian and White (4)
- ☐ 5 (5)
- ☐ 6 (6)
- ☐ 7 - More White (7)

If an Asian American and a White American have a kid...

Do you think the kid will fit in better with Asian people or White people?

- ☐ 1 - Better with Asians (1)
- ☐ 2 (2)
- ☐ 3 (3)
- ☐ 4 - Equally well with Asians and Whites (4)
- ☐ 5 (5)
- ☐ 6 (6)
- ☐ 7 - Better with Whites (7)

Do you think the kid will be accepted more by Asian people or by White people?

- ☐ 1 - More by Asians (1)
- ☐ 2 (2)
- ☐ 3 (3)
- ☐ 4 - Equally by Asians and Whites (4)
- ☐ 5 (5)
- ☐ 6 (6)
- ☐ 7 - More by Whites (7)

Do you think the kid will feel most comfortable hanging out with Asian people or White people?

- ☐ 1 - More comfortable with Asians (1)
- ☐ 2 (2)
- ☐ 3 (3)
- ☐ 4 - Equally comfortable with Asians and Whites (4)
- ☐ 5 (5)
- ☐ 6 (6)
- ☐ 7 - More comfortable with Whites (7)

Do you think the kid will end up hanging out with Asian people or with White people more?

- ☐ 1 - More with Asians (1)
- ☐ 2 (2)
- ☐ 3 (3)
- ☐ 4 - Equally with Asians and Whites (4)
- ☐ 5 (5)
- ☐ 6 (6)
- ☐ 7 - More with Whites (7)



If an Asian American and a White American have a kid...

Do you think the kid should be thought of as relatively Asian or relatively White?

- ☐ 1 - Relatively Asian (1)
- ☐ 2 (2)
- ☐ 3 (3)
- ☐ 4 - Equally Asian and White (4)
- ☐ 5 (5)
- ☐ 6 (6)
- ☐ 7 - Relatively White (7)

Will the kid give off the general impression of being more Asian or more White?

- ☐ 1 - More Asian (1)
- ☐ 2 (2)
- ☐ 3 (3)
- ☐ 4 - Equally Asian and White (4)
- ☐ 5 (5)
- ☐ 6 (6)
- ☐ 7 - More White (7)

Would you consider the kid more Asian or more White?

- ☐ 1 - More Asian (1)
- ☐ 2 (2)
- ☐ 3 (3)
- ☐ 4 - Equally Asian and White (4)
- ☐ 5 (5)
- ☐ 6 (6)
- ☐ 7 - More White (7)

Do you think the kid will be more like his/her Asian parent or his/her White parent?

- ☐ 1 - More like the Asian parent (1)
- ☐ 2 (2)
- ☐ 3 (3)
- ☐ 4 - Equally like the Asian and White parent (4)
- ☐ 5 (5)
- ☐ 6 (6)
- ☐ 7 - More like the White parent (7)

Did you experience any technical difficulties during the study?

- ☐ Yes (1) \_\_\_\_\_
- ☐ Maybe (2)
- ☐ No (3)

Did you notice anything unusual about the study?

What do you think the study was about?

Which ethnic group do you belong to?

- ☐ African American/Black (1)
- ☐ Asian/Asian American/Pacific Islander (2)
- ☐ Caucasian/White (3)
- ☐ Latino/Hispanic (4)
- ☐ Middle Eastern (5)
- ☐ Native American (6)
- ☐ Biracial/ Mixed Race (please specify) (7) \_\_\_\_\_

What is your sex?

- ☐ Male (1)
- ☐ Female (2)

How old are you (in years)?

In what country were you born?

- ☐ United States (1)
- ☐ Other (2) \_\_\_\_\_

Do you consider the United States to be your native country? If not, please specify your native country.

- ☐ Yes (1)
- ☐ No (2) \_\_\_\_\_

What is the highest level of education that you completed?

- ☐ No Formal Education (1)
- ☐ Elementary School (2)
- ☐ Some High School (3)
- ☐ Completed High School (4)
- ☐ Some College (5)
- ☐ BA/BS Degree (6)
- ☐ Some Graduate/Professional School (7)
- ☐ Hold Graduation/Professional Degree (8)

#### **Study 4 Manipulation and Measures**

Which racial/ethnic group do you belong to?

- ☐ African American/Black (1)
  - ☐ Asian/Asian American/Pacific Islander (2)
  - ☐ Caucasian/White (3)
  - ☐ Latino/Hispanic (4)
  - ☐ Middle Eastern (5)
  - ☐ Native American (6)
  - ☐ Biracial/ Mixed Race (please specify) (7) \_\_\_\_\_
  - ☐ Other (please specify) (8) \_\_\_\_\_
- 

What is your ethnic background?

---

What is your gender?

- ☐ Male (1)
  - ☐ Female (2)
  - ☐ Other (3) \_\_\_\_\_
- 

How old are you (in years)?

---

In what country were you born?

- ☐ United States (1)
  - ☐ Other (2) \_\_\_\_\_
- 

Do you consider the <st1:country-region w:st="on"><st1:place w:st="on">United States</st1:place></st1:country-region> to be your native country? If not, please specify your native country.

- ☐ Yes (1)
  - ☐ No (2) \_\_\_\_\_
-

<p>What is the highest level of education you have completed?</p>

- ☐ No Formal Education (1)
  - ☐ Elementary School (2)
  - ☐ Some High School (3)
  - ☐ Completed High School (4)
  - ☐ Some College (5)
  - ☐ BA/BS Degree (6)
  - ☐ Some Graduate/Professional School (7)
  - ☐ Hold Graduation/Professional Degree (8)
- 

<p>What is the highest level of education your father has completed?</p>

- ☐ No Formal Education (1)
  - ☐ Elementary School (2)
  - ☐ Some High School (3)
  - ☐ Completed High School (4)
  - ☐ Some College (5)
  - ☐ BA/BS Degree (6)
  - ☐ Some Graduate/Professional School (7)
  - ☐ Hold Graduation/Professional Degree (8)
- 

<p>What is the highest level of education your mother has completed?</p>

- ☐ No Formal Education (1)
- ☐ Elementary School (2)
- ☐ Some High School (3)
- ☐ Completed High School (4)
- ☐ Some College (5)
- ☐ BA/BS Degree (6)
- ☐ Some Graduate/Professional School (7)
- ☐ Hold Graduation/Professional Degree (8)

---

End of Block

# White Identity Preferences Manipulation

## Asian-White Biracials Often Identify as White, Recent Studies Show

Social scientists examining the experience of Asian-White biracial individuals in the United States have found that these individuals report identifying as White more often than identifying as Asian.

One recent national survey, released in June 2016 by the Pew Research Center, found that biracial adults who are both White and Asian say they feel like they are more White than they are Asian. Biracial adults who are White and Asian say they have more in common with Whites than they do with Asians (60% vs. 33%). A greater proportion also report having a lot of contact with family members who are White than with family members who are Asian (61% vs. 42%).

Interviewed about these reports, Joshua Chan, a 27 year-old Asian-White biracial man from Massachusetts, said, “Yes, those findings don’t surprise me. Most Asian-White biracials I know feel and act mostly White. To be honest, most days I just don’t feel all that Asian.” Similarly, Stephanie Smith, 24, who is also Asian-White biracial and lives in Illinois, simply stated, “These findings sound right to me!”

End of Block

---

# Asian Identity Preferences Manipulation

## Asian-White Biracials Often Identify as Asian, Recent Studies Show

Social scientists examining the experience of Asian-White biracial individuals in the United States have found that these individuals report identifying as Asian more often than identifying as White.

One recent national survey, released in June 2016 by the Pew Research Center, found that biracial adults who are both White and Asian say they feel like they are more Asian than they are White. Biracial adults who are White and Asian say they have more in common with Asians than they do with Whites (60% vs. 33%). A greater proportion also report having a lot of contact with family members who are Asian than with family members who are White (61% vs. 42%).

Interviewed about these reports, Joshua Chan, a 27 year-old Asian-White biracial man from Massachusetts, said, “Yes, those findings don’t surprise me at all. Most Asian-White biracials I know feel and act mostly Asian. To be honest, most days I just don’t feel all that White.” Similarly, Stephanie Smith, 24, who is also Asian-White biracial and lives in Illinois, simply stated, “These findings sound right to me!”

Generally speaking, how do you think people who are half Asian and half White want to identify?

- ☐ As more Asian 1 (1)
  - ☐ 2 (2)
  - ☐ 3 (3)
  - ☐ As Equally Asian and White 4 (4)
  - ☐ 5 (5)
  - ☐ 6 (6)
  - ☐ As more White 7 (7)
- 

Generally speaking, how do you think people who are half Asian and half White want to be seen?

- ☐ As more Asian 1 (1)
- ☐ 2 (2)
- ☐ 3 (3)
- ☐ As Equally Asian and White 4 (4)
- ☐ 5 (5)
- ☐ 6 (6)
- ☐ As more White 7 (7)

In general, Asian-White biracials probably take sides with...

- ☐ Asians 1 (1)
  - ☐ 2 (2)
  - ☐ 3 (3)
  - ☐ Asians and Whites equally 4 (4)
  - ☐ 5 (5)
  - ☐ 6 (6)
  - ☐ Whites 7 (7)
-

In general, Asian-White biracials probably care more about...

- ☐ Asians 1 (1)
  - ☐ 2 (2)
  - ☐ 3 (3)
  - ☐ Asians and Whites equally 4 (4)
  - ☐ 5 (5)
  - ☐ 6 (6)
  - ☐ Whites 7 (7)
- 

In general, Asian-White biracials will primarily look out for the interests of...

- ☐ Asians 1 (1)
  - ☐ 2 (2)
  - ☐ 3 (3)
  - ☐ Asians and Whites equally 4 (4)
  - ☐ 5 (5)
  - ☐ 6 (6)
  - ☐ Whites 7 (7)
- 

In general, Asian-White biracials will be more loyal to...

- ☐ Asians 1 (1)
- ☐ 2 (2)
- ☐ 3 (3)
- ☐ Asians and Whites equally 4 (4)
- ☐ 5 (5)
- ☐ 6 (6)
- ☐ Whites 7 (7)

If an Asian American and a White American have a kid, would you think of the kid as relatively Asian or relatively White?

- ☐ Relatively Asian 1 (1)
  - ☐ 2 (2)
  - ☐ 3 (3)
  - ☐ Equally Asian and White 4 (4)
  - ☐ 5 (5)
  - ☐ 6 (6)
  - ☐ Relatively White 7 (7)
- 

If an Asian American and a White American have a kid, would you consider the kid more Asian or more White?

- ☐ More Asian 1 (1)
  - ☐ 2 (2)
  - ☐ 3 (3)
  - ☐ Equally Asian and White 4 (4)
  - ☐ 5 (5)
  - ☐ 6 (6)
  - ☐ More White 7 (7)
- 

If an Asian American and a White American have a kid, how would you categorize this child?

- ☐ As Asian 1 (1)
- ☐ 2 (2)
- ☐ 3 (3)
- ☐ As equally Asian and White 4 (4)
- ☐ 5 (5)
- ☐ 6 (6)
- ☐ As White 7 (7)

What do you think this study was about?

---



Did anything about the study seem unusual to you?
